# Supplementary material for: Simultaneous sulfur hexafluoride and nitrogen multiple-breath washout (MBW) to examine inherent differences in MBW outcomes
Source: PubMed Central journal article supplement — ERJ Open Res. 2019 Nov 4;5(4):00234-2018. doi: 10.1183/23120541.00234-2018 (PMC6826248; doi:10.1183/23120541.00234-2018), 2019-11-04
Supplement: 00234-2018.supplement.pdf [file 00234-2018.supplement.pdf]

## **Online supplement – Why do SF<sub>6</sub> and N<sub>2</sub> multiple breath washouts give different results?**

This online supplement provides additional information to the main body of text including patient demographics, device specifics and more detailed methods and results for the interested reader.

### **Methods**

#### **Comparison of MBW devices**

Subjects breathed tidally, inhaling 0.2% SF<sub>6</sub> followed by room air for SF<sub>6</sub><sub>Inn</sub> or medical air followed by 100% O<sub>2</sub> for N<sub>2</sub><sub>ExD</sub>. The washout gases were monitored until they reached the conventional 1/40<sup>th</sup> of the starting concentration (LCI<sub>2.5</sub>), the earlier 1/20<sup>th</sup> cut off point (LCI<sub>5</sub>) was also assessed. LCI<sub>2.5</sub> is the historical limit of the gas analysers and so is an arbitrary cut off to assess gas mixing and LCI<sub>5</sub> has been used to shorten the testing time to increase feasibility in complex patients [5]. Real time assessments of breathing pattern, leaks or abnormalities were made and traces excluded according to the 2013 consensus statement [6].

Calibration of each device was performed as per manufacturer guidelines and specific standard operating procedures (UKCFGT consortium, Bell 2010 and Standard Operating Procedure: Multiple Breath Nitrogen Washout, Exhalyzer D, Eco Medics AG, Version 1, Jensen *et al.* 2013). MBW data was analysed on specialist offline analysis software (IGOR Pro, simple washout software (SW) for SF<sub>6</sub><sub>Inn</sub> (SimpleWashout Manual, Version 1.5, UKCFGT consortium, Bell 2010) or online analysis software, Spiroware for N<sub>2</sub><sub>ExD</sub> (Standard Operating Procedure: Multiple Breath Nitrogen Washout, Exhalyzer D, Eco Medics AG, Version 1, Jensen *et al.* 2013)). Both software are based on or have been validated using Testpoint™ (Singer, F., et al., *A realistic validation study of a new nitrogen multiple-breath washout system*. PLoS One, 2012. 7(4): p. e36083).

The equipment deadspace for each device was small (38ml for Inn and 46ml for ExD when using set 3 deadspace reducer). Particular emphasis was placed on the quality control guidelines from the North American and European CF Society Clinical Trials Network LCI Central Over reading Centres.

Statistics: FEV<sub>1</sub> was compared to LCI from both devices using correlations, the Shapiro-Wilk test was used to assess normality and the slopes were analysed using linear regression. Differences in linear regression slopes were assessed using analyses of covariance. All data was analysed in GraphPad Prism 6 (GraphPad Software, Inc).

## **Simultaneous washout**

In order to independently test the washout of both SF<sub>6</sub> and N<sub>2</sub> and remove equipment related variables a simultaneous washout was attempted. As shown in the main text (Figure 2) the Innocor and the Exhalyzer D were attached together using a plastic connector. The serial order of the devices was tested, with no difference between results, but the final placement was for ease of patient attachment. With the flowmeters attached, the devices were calibrated for flow and gas as per the specific SOP's so as to account for the extra resistance and deadspace (73.3ml), deadspace was adjusted for in the ExD set up page.

Testing was performed in much the same way as above but with slight adjustments to deliver both SF<sub>6</sub> in washin and 100% O<sub>2</sub> in washout for the washout of both gases simultaneously.

*Washin* – Tidal breathing was completed in washin, using a 0.2% SF<sub>6</sub> gas cylinder.

*Switch to washout* – Once equilibrium with 0.2% SF<sub>6</sub> was detected by the Innocor device (normally around 2 minutes in healthy individuals) "Start WO" button on the Exhalyzer D was pressed. The gas tubing was manually swapped from the 0.2% SF<sub>6</sub> to the Exhalyzer D tubing. 100% O<sub>2</sub> (electronically switched on by the Exhalyzer D) was then breathed for washout of 0.2% SF<sub>6</sub> and 79% N<sub>2</sub>.

*End of washout* – both gases were washed out to 2.5% of their starting concentration (SF<sub>6</sub> monitored on the Innocor device and N<sub>2</sub> on the Exhalyzer D).

*Extended washout* – An extended washout was performed to observe how low a gas concentration could be achieved beyond the 1/40<sup>th</sup> end tidal gas concentration. The participant continued to breathe 100% O<sub>2</sub> for a further 2 minutes as a reflection of the washin time of SF<sub>6</sub> to see if N<sub>2</sub> would decrease to its minimal level with similar timings as SF<sub>6</sub>. Two further minutes of breathing 100% O<sub>2</sub> did not cause light-headedness in any subject.

*Recorded variables* - Gas concentration, breath number and time to washout were recorded rather than calculating LCI to avoid any complications related to flow volume and signal synchronisation discrepancies between the devices.

*Analysis* – Analysis was performed after exporting the raw breath tables from both analysis software and matching each breath with the decay of N<sub>2</sub> and SF<sub>6</sub>. Deadspace and dynamic delay time corrections were therefore not required. SF<sub>6</sub> and N<sub>2</sub> (per breath) were converted to percentages and then normalised on a Log 10 scale so that they could be plotted on the same graph.

## **Respiratory Mass Spectrometer – Simultaneous washout**

Gas Calibration of the RMS was completed in line with an in house SOP derived from the AMIS 2000 SOP (AMIS 2000, Medical mass spectrometer system, instructions for use available upon request from Innovision, 2010, [http://www.innovision.dk/Products/AMIS\\_2000.aspx](http://www.innovision.dk/Products/AMIS_2000.aspx)). The

vacuum pump remained switched on at all times to remove air from the testing chamber. Full calibration at the start of each day and 2 point calibration before each individual test to ensure the secondary electron multiplier was optimising voltages correctly. The calibration gas ( $\pm 1\%$  accuracy – 4%SF<sub>6</sub>, 4% He, 7% CO<sub>2</sub>, 21% O<sub>2</sub>, 64% N<sub>2</sub>) was exposed to the sample line and the RMS identified the sample concentrations. For this testing SF<sub>6</sub> was tuned to high priority.

For testing the RMS gas probe was placed in situ in between the ExD and Inn flowmeters. A specialist 1% SF<sub>6</sub> gas mix was utilised as the RMS and Innocor both technically have the capacity to detect and record this concentration. As the Innocor and Exhalyzer were in place, a sample of subjects completed MBW tests to see the impact and the contribution of the 1% vs. 0.2% on the devices by comparing results against each other. There were no differences in washout times of 0.2% or 1% SF<sub>6</sub> on the Innocor device and the N<sub>2</sub> washout was not notably impacted by 0.2% or 1% SF<sub>6</sub>.

MBW Testing was completed as above for simultaneous testing.

For analysis the raw ASCII files were exported, and manipulated in Excel to fit the required column and order requirements for the gas concentrations per breath to be calculated using the simple washout software. For calculation of the end tidal gas concentration of each breath during 1% testing, the RMS gas concentration data needed to be matched with flow. The Innocor raw data file was easy to manipulate as it contains fewer parameters than the Exhalyzer D raw data file, the simple washout software is also more easily manipulated since the IGOR software is designed to handle large datasets in a variety of formats

(<https://www.wavemetrics.com/products/igorpro/igorpro.htm>). First the raw data files were aligned for sample time with the Innocor raw data file. The SF<sub>6</sub> trace in the original Innocor file was then replaced by the SF<sub>6</sub> or the N<sub>2</sub> trace from the RMS. Data was imported into simple washout in the conventional way but now the software showed the RMS gas concentrations. The gas signal per breath was calculated by the highlighting the peak of each breath, generating a mean Cet. Problems with signal synchronisation (gas from RMS and flow from the modified Innocor) meant that calculation of FRC, CEV and in turn LCI were not appropriate. Final results (gas concentrations and breath number to washout) were compared using t tests and plotted together to look at the decay of both SF<sub>6</sub> and N<sub>2</sub>.

Device specifics for all methodological sections are described in OLS Table 1. As described in the simultaneous washout and RMS sections, efforts were not made to adjust and account for potential sources of bias from the different hardware or software but instead raw data was utilised to simplify and remove confounding variables.

**OLS Table 1 – Device specifics for the MBW comparison, simultaneous washout and RMS simultaneous washout.**

|                                | <b>Modified Innocor (Innovision 6.11, Odense, Denmark)</b>                                                                                                                                                                                                                                                                                                                                                                                                                                                                                | <b>Exhalyzer D (Ecomedics AG, Duerten, Switzerland)</b>                                                                                                                                                                                                                                                                                                                                                                                                                                                   | <b>AMIS 2000 Respiratory Mass Spectrometer (Innovision, Odense, Denmark)</b> | <b>Simultaneous washout (Exhalyzer D and Innocor)</b>                                                                                                        | <b>RMS Simultaneous washout (Exhalyzer D, Innocor and RMS)</b>                                                                                                    |
|--------------------------------|-------------------------------------------------------------------------------------------------------------------------------------------------------------------------------------------------------------------------------------------------------------------------------------------------------------------------------------------------------------------------------------------------------------------------------------------------------------------------------------------------------------------------------------------|-----------------------------------------------------------------------------------------------------------------------------------------------------------------------------------------------------------------------------------------------------------------------------------------------------------------------------------------------------------------------------------------------------------------------------------------------------------------------------------------------------------|------------------------------------------------------------------------------|--------------------------------------------------------------------------------------------------------------------------------------------------------------|-------------------------------------------------------------------------------------------------------------------------------------------------------------------|
| <b>Flow volume measurement</b> | <p>The flowmeter contains a screen with a pressure output on each side of the screen. By measuring the pressure drop, the flow is calculated.</p> <p>One hertz is one cycle per second, so the sampling frequency of the Innocor is 100 samples per second.</p> <p>There is an automatic offset adjustment prior to each 2x5 strokes. Deviation <math>\pm 2\%</math> relative after a gain calibration, i.e. <math>\pm 0.02</math> litre @ 1 litre calibration syringe and <math>\pm 0.06</math> litre @ 3 litre calibration syringe.</p> | <p>Two ultrasonic transducers mounted at different sides of the flow channel transmit ultrasonic pulses in an up a downstream direction, the measured transit times determine flow and molecular mass of the gas flow.</p> <p>Ultrasonic transit time detection (10ns time resolution, sampling up to 200Hz). Set 3 Deadspace reducer – flow accuracy <math>\pm 3\%</math> or <math>\pm 5\text{ml/s}</math>, dead space = 20ml. If Flow calibration varies by more than 2% it should be repeated.</p>     | n/a – flow signal not completed.                                             | n/a - raw gas concentrations were extracted from the Innocor and Exhalyzer and not incorporated into the flow signal in an attempt to remove equipment bias. | n/a - raw gas concentrations were extracted from the RMS, Innocor and Exhalyzer and not incorporated into the flow signal in an attempt to remove equipment bias. |
| <b>CO<sub>2</sub> sensor</b>   | <p>A photo acoustic analyser measures the effect of absorbed energy on matter by acoustic detection. A laser beam running across an unknown gas hits a known “matter” with known sound wavelengths and the intensity of the sound is proportional to the light the gas gives off, in turn revealing the gas. Principle –photo acoustic spectroscopy.</p> <p>Range - 0-10%</p> <p>Accuracy – <math>\pm 1\%</math> relative</p> <p>Rise time (10-90%) = &lt;250ms</p> <p>Sample rate 100Hz</p>                                              | <p>CO<sub>2</sub> is measured directly in the patient’s breathing circuit. The CO<sub>2</sub> measurement module utilizes advanced, self-calibrating infrared absorption technology to insure accuracy and eliminate the need for routine user calibration.</p> <p>Principle – Mainstream single beam infrared, self-calibrating.</p> <p>Range - 0-150mmHg or 0 to 19.7%.</p> <p>Accuracy – 2mmHg (0-40mmHg), 5% of reading (41-70mmHg)</p> <p>Rise time (10-90%) = &lt;60ms</p> <p>Sample rate 100Hz</p> | See RMS O <sub>2</sub>                                                       | See Innocor and Exhalyzer D                                                                                                                                  | See RMS                                                                                                                                                           |

|                              | Modified Innocor (Innovision 6.11, Odense, Denmark)                                                                                                                                                                                                                                                                                                                                                                                                                                                                                                                                                                                                            | Exhalyzer D (Ecomedics AG, Duerten, Switzerland)                                                                                                                                                                                                                                                                                                                                                                                                                                                                                                                                                                   | AMIS 2000 Respiratory Mass Spectrometer (Innovision, Odense, Denmark)                                                                                                                                                                                                                                                                                                                                                                                                                                                                                                                                                                                                                | Simultaneous washout (Exhalyzer D and Innocor) | RMS Simultaneous washout (Exhalyzer D, Innocor and RMS) |
|------------------------------|----------------------------------------------------------------------------------------------------------------------------------------------------------------------------------------------------------------------------------------------------------------------------------------------------------------------------------------------------------------------------------------------------------------------------------------------------------------------------------------------------------------------------------------------------------------------------------------------------------------------------------------------------------------|--------------------------------------------------------------------------------------------------------------------------------------------------------------------------------------------------------------------------------------------------------------------------------------------------------------------------------------------------------------------------------------------------------------------------------------------------------------------------------------------------------------------------------------------------------------------------------------------------------------------|--------------------------------------------------------------------------------------------------------------------------------------------------------------------------------------------------------------------------------------------------------------------------------------------------------------------------------------------------------------------------------------------------------------------------------------------------------------------------------------------------------------------------------------------------------------------------------------------------------------------------------------------------------------------------------------|------------------------------------------------|---------------------------------------------------------|
| <b>O<sub>2</sub> sensors</b> | <p>Oxigraph O<sub>2</sub> sensor - The patented Oxigraph sensor uses laser diode absorption spectroscopy in the visible spectrum. Oxygen absorption is in a region of the visible spectrum (760 nm) where there is no interference or absorption by the other gases. As the oxygen concentration increases, the light intensity is attenuated, thereby identifying the concentration. The photo detector response varies linearly with the oxygen concentration.</p> <p>Principle – laser diode absorption spectroscopy – sample gas flow 120ml/min<br/>Range – 5-100%<br/>Accuracy ± 1% relative<br/>Rise time (10-90%) - &lt;250ms<br/>Sample rate 100Hz</p> | <p>Oxigraph O<sub>2</sub> sensor - The fast oxygen side stream measurement module measures the oxygen respiration waveform breath-by-breath giving a qualitative indication of ventilation and the oxygen uptake.</p> <p>The patented oxygen sensor uses laser diode absorption method in the infrared spectrum.</p> <p>The lag time and sample flow is compensated by SPIROWARE®.</p> <p>Principle – side stream, laser diode absorption – sample gas flow 200ml/min<br/>Range - 2 to 100%<br/>Accuracy – 0.3%<br/>Resolutions/Linearity – 0.01% and 0.2%<br/>Rise time (10-90%) – 80ms<br/>Sample rate 100Hz</p> | <p>A high quality quadropole measures mass to charge ratio of all gases specified in the system set up. According to the gas specifications different oscillating electrical charges are applied to four cylindrical rods within the device. Because of the electrical charge applied, gas ions bounce through the rods at different trajectories. The mass to charge ratio can then be calculated for each gas. The signal is multiplied by the secondary electron multiplier (SEM), which enables detection of the gas quantity.</p> <p>Mass range 1-200 atomic mass unit</p> <p>Sensitivity &gt;2x10<sup>-3</sup> A/mili bar</p> <p>Response Time 50msec<br/>Sample rate 33Hz</p> | See Innocor and Exhalyzer D                    | See RMS                                                 |
| <b>N<sub>2</sub> sensor</b>  | <p>n/a</p> <p>Attempts were made to indirectly calculate N<sub>2</sub> from the O<sub>2</sub> and CO<sub>2</sub> readings. Issues with the calculation of viscosity and accounting for signal synchronisation mean the testing was aborted.</p>                                                                                                                                                                                                                                                                                                                                                                                                                | <p>N<sub>2</sub> is indirectly calculated using the following formula.</p> $N_2 = (100 - O_2 - CO_2)/(1+\beta)$ <p>The beta is the relative fraction of Argon/ N<sub>2</sub> in air. Since air contains 0.934% Argon and 78.084% N<sub>2</sub>, beta is 0.934/78.084≈0.012.</p>                                                                                                                                                                                                                                                                                                                                    | See RMS O <sub>2</sub>                                                                                                                                                                                                                                                                                                                                                                                                                                                                                                                                                                                                                                                               | See Innocor and Exhalyzer D                    | See RMS                                                 |

|                                  | <b>Modified Innocor (Innovision 6.11, Odense, Denmark)</b>                                                                                                    | <b>Exhalyzer D (Ecomedics AG, Duerten, Switzerland)</b>                                                                                                                                                                                                                    | <b>AMIS 2000 Respiratory Mass Spectrometer (Innovision, Odense, Denmark)</b>                                                                                       | <b>Simultaneous washout (Exhalyzer D and Innocor)</b>                                                                      | <b>RMS Simultaneous washout (Exhalyzer D, Innocor and RMS)</b>                                                                                                        |
|----------------------------------|---------------------------------------------------------------------------------------------------------------------------------------------------------------|----------------------------------------------------------------------------------------------------------------------------------------------------------------------------------------------------------------------------------------------------------------------------|--------------------------------------------------------------------------------------------------------------------------------------------------------------------|----------------------------------------------------------------------------------------------------------------------------|-----------------------------------------------------------------------------------------------------------------------------------------------------------------------|
| <b>SF<sub>6</sub> sensor</b>     | See Innocor CO <sub>2</sub>                                                                                                                                   | n/a                                                                                                                                                                                                                                                                        | See RMS O <sub>2</sub>                                                                                                                                             | See Innocor CO <sub>2</sub>                                                                                                | See RMS O <sub>2</sub> and Innocor CO <sub>2</sub>                                                                                                                    |
| <b>Equipment deadspace</b>       | Pneumotach 18ml.<br>Hans Rudolph pnemotach – 4700A – 4719series flow range 0-100 L/min<br>Adult green filter – 37ml<br>Paediatric slim line filter – 20ml     | Pre-Cap deadspace (volume from patient to mid-CO <sub>2</sub> sensor)<br>SET 1 [ml] (2)<br>SET 2 [ml] (24)<br>SET 3 [ml] (24)<br>Post-Cap deadspace (volume from mid-CO <sub>2</sub> sensor to mid flow sensor)<br>SET 1 [ml] (3.5)<br>SET 2 [ml] (9.5)<br>SET 3 [ml] (22) | n/a – flow not recorded                                                                                                                                            | Deadspace total = 73.3ml (20ml + 3.3ml Exhalyzer D, 18ml Innocor and 30ml bacterial filter).                               | Deadspace total = 73.3ml (20ml + 3.3ml Exhalyzer D, 18ml Innocor and 30ml bacterial filter).                                                                          |
| <b>Analysis software version</b> | Simple washout, IGOR Pro (Wavemetrics Inc., version 6.20B3 or above).                                                                                         | Spiroware 3.1.6.17312                                                                                                                                                                                                                                                      | Analysis of each gas concentration was achieved using the online data loading function on the RMS (ATPC turned on, counting breaths and gas Cet from each breath). | Gas concentration, breath number and time to washout were recorded to avoid equipment flow and gas synchronisation issues. | The 1% SF <sub>6</sub> and N <sub>2</sub> washout testing used the simple washout software to estimate the end tidal concentration from raw ASCII files from the RMS. |
| <b>Calculation of Cet</b>        | SW uses an automatic algorithm to determine SF <sub>6</sub> Cet; a smoothed signal where the peak from the first peak working back from the breath-end point. | Calculates Cet from the median concentration between 90-95% of the volume of each expired breath                                                                                                                                                                           | Online dataloading on the RMA highlighted the mean Cet.                                                                                                            | Cet from Innocor and Exhalyzer                                                                                             | An average Cet was calculated using the SW software                                                                                                                   |

|                              | Modified Innocor (Innovision 6.11, Odense, Denmark)                                                                                                                                                                                                                                                            | Exhalyzer D (Ecomedics AG, Duerten, Switzerland)                                                                                                                               | AMIS 2000 Respiratory Mass Spectrometer (Innovision, Odense, Denmark)                                                                                                                                                                                                                                                                                              | Simultaneous washout (Exhalyzer D and Innocor) | RMS Simultaneous washout (Exhalyzer D, Innocor and RMS) |
|------------------------------|----------------------------------------------------------------------------------------------------------------------------------------------------------------------------------------------------------------------------------------------------------------------------------------------------------------|--------------------------------------------------------------------------------------------------------------------------------------------------------------------------------|--------------------------------------------------------------------------------------------------------------------------------------------------------------------------------------------------------------------------------------------------------------------------------------------------------------------------------------------------------------------|------------------------------------------------|---------------------------------------------------------|
| <b>Signal to noise ratio</b> | Signal to Noise ratio compares the level of desired signal detection to the amount of background noise. So the Innocor detects SF <sub>6</sub> at 0.2% (in the gas cylinder) at 0.001% (1/1000 <sup>th</sup> ) accuracy. >500 @ 21% O <sub>2</sub> .                                                           | O <sub>2</sub> = 0.3%<br>CO <sub>2</sub> = 5% of the reading 41-70 mmHg                                                                                                        | Signal volts should be as high as possible (8-9 volts) in the signal optimisation calibration stage.<br>S:N ~200<br><br>RMS auto-optimises itself as the SEM increases and decreases its signal response to different species of gas.<br>Optimal sampling range between 0.1-4% SF <sub>6</sub>                                                                     | See Innocor and Exhalyzer.                     | See RMS, Innocor and Exhalyzer.                         |
| <b>Viscosity</b>             | Viscosity correction is not hard coded for in version 6.11 of the Innocor device.<br><br>Offline attempts were made to correct for viscosity when using the Innocor device with 100% O <sub>2</sub> under guidance from Innovision but difficulties in matching signals meant that this testing was discarded. | No correction, since ultrasonic flow measurement is independent of viscosity.<br><br>Possible that viscosity should be incorporated because of the sidestream analysis of gas. | Automatic Total Pressure Correction (ATPC)<br><br>(Ensures the sum of the partial pressures of gases is constant (100% in line with calibration gas cylinder) despite changes to the ion source i.e. with 100% O <sub>2</sub> there would be increased viscosity (gas flow changes) and total pressure of ions but the signal will account for this with ATPC on). | See Innocor and Exhalyzer.                     | See RMS, Innocor and Exhalyzer.                         |
| <b>Sample flow rate</b>      | 120ml/min                                                                                                                                                                                                                                                                                                      | 200ml/min                                                                                                                                                                      | <20ml/min                                                                                                                                                                                                                                                                                                                                                          | See Innocor and Exhalyzer                      | See Innocor, Exhalyzer and RMS.                         |

**Results:**

All of the participants took part in the main comparison of the Innocor and Exhalyzer D device. Samples of patients took part in the sequential study parts after review of their previous MBW tests and those who had regular tidal breathing and were able to return were selected.

**OLS Table 2 – Patient demographics (mean ± SD unless stated).**

|                                   | Comparison of MBW devices  |                  |
|-----------------------------------|----------------------------|------------------|
|                                   | CF (47)                    | HC (42)          |
| Gender                            | 24 (51%) Female            | 26 (62%) Female  |
| Age (years)<br>(median(range))    | 16.05(5.9-63.7)            | 24.32 (5.7-56.1) |
| Height (cm)                       | 154.6 ± 52.2               | 158.4 ± 17.9     |
| Weight (kg)                       | 52.2 ± 18                  | 59.7 ± 20.6      |
| FEV <sub>1</sub> (%) (Z<br>Score) | 72.9 ± 16.8, -2.29 ± 1.43  | Not done         |
|                                   | Simultaneous Washout       |                  |
|                                   | CF (n=5)                   | HC (n=8)         |
| Gender                            | 4 (80%) Female             | 5 (63%) Female   |
| Age (years)<br>(median(range))    | 24 (12-51)                 | 31.25 (23-50)    |
| Height (cm)                       | 160.4 ± 11.13              | 171 ± 7.66       |
| Weight (kg)                       | 60.5 ± 18.23               | 74.2 ± 20.1      |
| FEV <sub>1</sub> (%) (Z<br>Score) | 84.02 ± 13.3, -1.3 ± 0.93  | Not done         |
|                                   | RMS – simultaneous washout |                  |
|                                   | CF                         | HC (10)          |
| Gender                            | Not done                   | 6 (60%) Female   |
| Age (years)<br>(median(range))    | Not done                   | 28.3 (21.4-35.3) |
| Height (cm)                       | Not done                   | 169.9 ± 10.4     |
| Weight (kg)                       | Not done                   | 66.7 ± 9.9       |
| FEV <sub>1</sub> (%) (Z<br>Score) | Not done                   | Not done         |

110 **OLS Table 3 – Coefficient of variation in primary outcomes**

|                                                | Comparison of MBW devices                    |                                              |
|------------------------------------------------|----------------------------------------------|----------------------------------------------|
|                                                | CF (47)                                      | HC (42)                                      |
| LCI CV% (SF6 and N2) p value                   | 3.7(0.02-13.02) and 3.06(0.1-1.74)<br>p>0.05 | 2.85(0.2-11.8) and 2.87 (0.1-10.9)<br>p>0.05 |
| FRC CV% (SF6 and N2) p value                   | 3.2(0.2-4.6) and 3.5(0-8.4) p>0.05           | 2.8(0.2-9.1) and 2.85(0-14.3) p>0.05         |
| CEV CV% (SF6 and N2) p value                   | 3.2(0.05-12.6) and 5.4(0.03-13.1)<br>p=0.03  | 3.2(0.03-10.7) and 3.7(0.2-12.1)<br>p>0.05   |
|                                                | Simultaneous Washout                         |                                              |
|                                                | CF (n=5)                                     | HC (n=8)                                     |
| Washout breath number (n) (SF6 and N2) p value | 24.8 ± 8.7 vs. 59.5 ± 28.3, p=0.063          | 32.0 ± 11.9 vs. 46.3 ± 13.7, p=0.001         |
| Washout breath number CV% (SF6 and N2) p value | 1.6(0-8) and 5.3(4.3-8.3) p>0.05             | 4.7(0-10.9) and 3.9(2.9-14.3) p>0.05         |
|                                                | RMS – simultaneous washout                   |                                              |
|                                                | CF                                           | HC (10)                                      |
| Washout breath number (n) (SF6 and N2) p value | Not done                                     | 34.5 ± 12.4 vs. 45.8 ± 19.1, p=0.005         |
| Washout breath number CV% (SF6 and N2) p value | Not done                                     | 5.1(1.6-14) and 3.0(0.8-5.9) p>0.05          |

111

112 **Results - Comparison of MBW devices**

113 100% of HC participants and 93% of CF patients were able to complete at least 2 acceptable  
114 MBW tests on both machines. (3 CF patients' traces were excluded at analysis due to poor  
115 quality). The LCI coefficients of variation (CV%) were small and not statistically different  
116 between devices (HC Inn 2.85(0.2-11.8) vs. HC ExD 2.87(0.1-10.9) p>0.05 and CF Inn 3.7 (0.02-  
117 13.02) vs. CF ExD 3.06 (0.1-7.4) p>0.05) or between HC and CF subjects (p>0.05). LCI values  
118 obtained from SF6<sub>Inn</sub> and N2<sub>ExD</sub> were tightly correlated with FEV<sub>1</sub> Z score (OLS Figure 1) but the

correlation slopes differed significantly, steeper with N2<sub>ExD</sub> (OLS Figure 1; p=0.05). LCI<sub>5</sub> was still higher in CF compared to HC but there was no difference in slopes between gases (OLS Figure 2 and Table 1) confirming that the latter part of the washout curve is most affected by the difference in behaviour of the two gases (Figure 2 and 3 main paper).

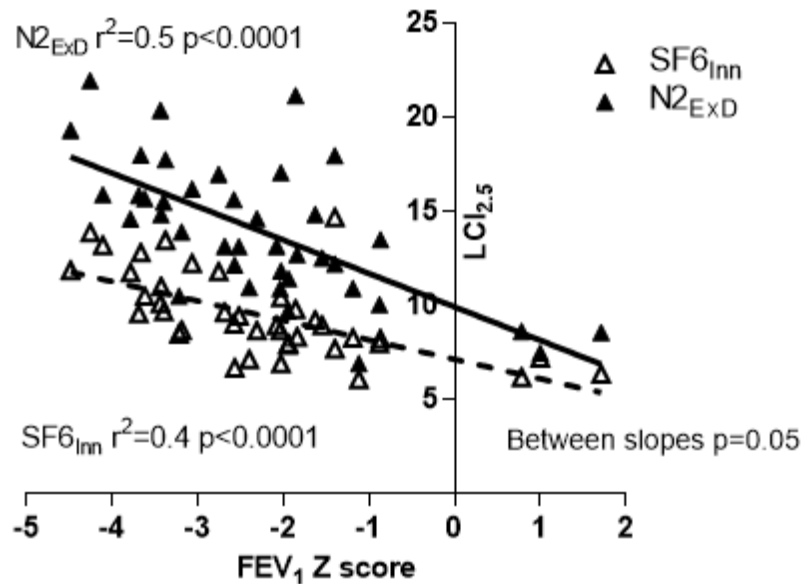

**OLS Figure 1** – Plot of LCI<sub>2.5</sub> (lung clearance index taken from the traditional end point of 1/40<sup>th</sup> of the starting concentration) vs. Forced Expiratory Volume in one second (FEV<sub>1</sub>) Z Score in cystic fibrosis patients from the Innocor (SF6<sub>Inn</sub>, open triangles) and the Exhalyzer D (N2<sub>ExD</sub>, closed triangles). The  $r^2$  values for each device are statistically significant ( $r^2=0.4$  for SF6<sub>Inn</sub>,  $p<0.0001$  and  $r^2=0.45$  for N2<sub>ExD</sub>,  $p<0.0001$ ). The  $r^2$  slopes are significantly different from each other ( $p=0.05$ ). FEV<sub>1</sub> Z scores are calculated using the Global Lung Initiative reference equations (Quanjer *et al.* 2012).

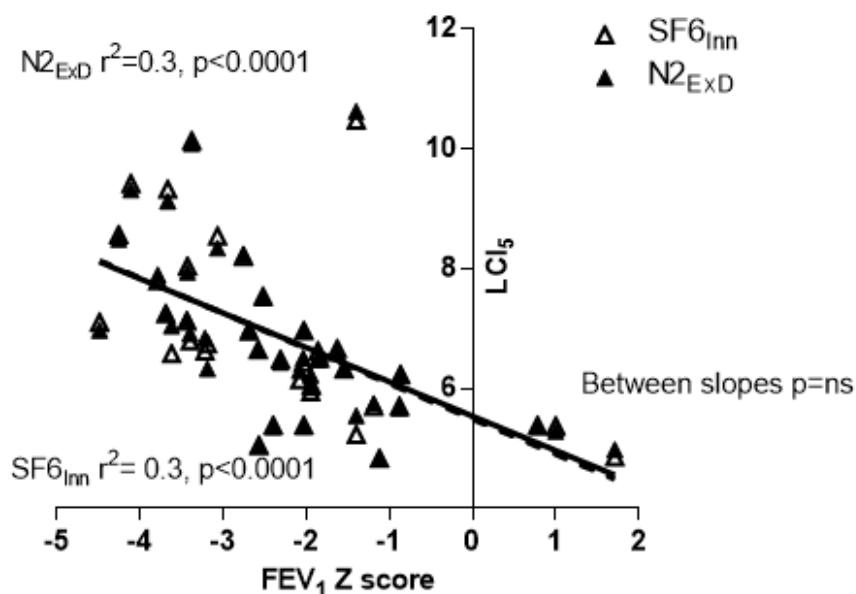

**OLS Figure 2** – Plot of LCI<sub>5</sub> (lung clearance index taken from the end point of 1/20<sup>th</sup> of the starting concentration) vs. Forced Expiratory Volume in one second (FEV<sub>1</sub>) Z score in cystic fibrosis patients from the Innocor (SF6<sub>Inn</sub>, open triangles) and the Exhalyzer D (N2<sub>ExD</sub>, closed triangles). The  $r^2$  values for each device are statistically significant ( $r^2=0.3$  for SF6<sub>Inn</sub>,  $p<0.0001$  and  $r^2=0.3$  for N2<sub>ExD</sub>,  $p<0.0001$ ) but they are not significantly different from each other ( $p=ns$ ). FEV<sub>1</sub> Z scores are calculated using the Global Lung Initiative reference equations (Quanjer *et al.* 2012).

## Results – RMS simultaneous washout

Breath number between the commercial devices and the RMS were compared. OLS Figure 3 shows that there were no differences between devices.

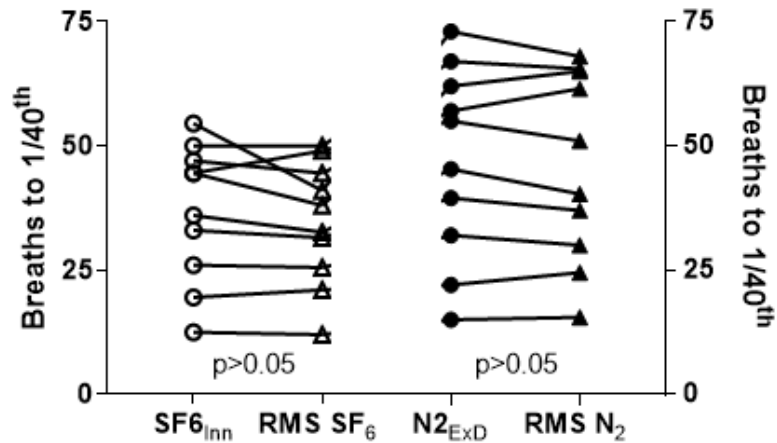

**OLS Figure 3** - Simultaneous washout of SF<sub>6</sub> and N<sub>2</sub> was completed using the Innocor (SF6<sub>Inn</sub>), and Exhalyzer D (N2<sub>ExtD</sub>) and the respiratory mass spectrometer (RMS) on 10 healthy control (HC) participants. This plot shows the difference in washout breaths for nitrogen (N<sub>2</sub>) and sulphur hexafluoride (SF<sub>6</sub>) (SF<sub>6</sub> open markers, N<sub>2</sub> closed markers) for 7 individuals in ExD/N<sub>2</sub> and SF6<sub>Inn</sub> (circles) vs. RMS (triangles). There were no significant differences between breath number for SF<sub>6</sub> (Ino and RMS) or N<sub>2</sub> (ExD and RMS). RMS breath results were manually calculated from the average end tidal gas concentration of gas at each breath and compared to breath number from each device.

170 OLS Figure 4 shows the washout decay of both N<sub>2</sub> (RMS and ExD) and SF<sub>6</sub> (RMS and Innocor). N<sub>2</sub>  
 171 for both devices still reaches the 1/40<sup>th</sup> end point after SF<sub>6</sub>.

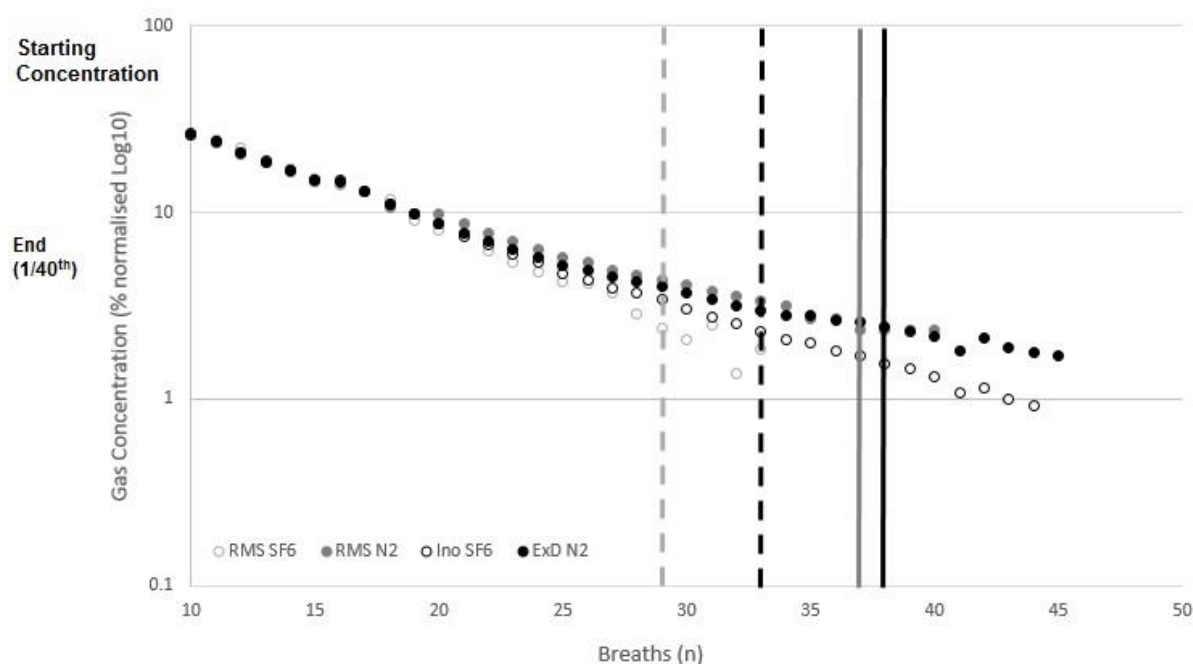

172  
 173 **OLS Figure 4** – Graph of an individual healthy control patient’s gas concentration decline  
 174 throughout a simultaneous washout using all devices for sulphur hexafluoride (SF<sub>6</sub>, open circles  
 175 (black=Innocor, grey= Respiratory Mass Spectrometer (RMS))) and Nitrogen (N<sub>2</sub>, closed circles  
 176 (black=Exhalyzer, grey= RMS)) vs. breath number starting from 10 breaths. The gases are  
 177 displayed in a normalised log scale so that each gas concentration is shown on the same graph.  
 178 The vertical lines (dashed = SF<sub>6</sub> (black=Innocor, grey= RMS), full line = N<sub>2</sub> (black=Innocor, grey=  
 179 RMS)) represent the end tidal gas concentration at 1/40<sup>th</sup> of the starting concentration. In all  
 180 subjects, SF<sub>6</sub> reached the end target first.

## OLS Discussion

The inherent differences between N<sub>2</sub> and SF<sub>6</sub> washouts are further defined by the large limits of agreement in the LCI<sub>2.5</sub> and FEV<sub>1</sub> Zscore plots. This difference is less apparent in the LCI<sub>5</sub> showing that the discrepancy is exaggerated at the tail end of the washout and with those with worse lung disease and therefore longer washouts.

Only head to head data during the same washin and washout is likely to definitively assess differences in MBW (Vermuelen, F., et al. *Comparison of lung clearance index measured during helium washin and washout in children with cystic fibrosis*. *Pediatr Pulmonol*, 2013. **48**(10): p. 962-9). Therefore using the RMS to complete a simultaneous washout is in part a valid test. The simultaneous washout with both the Innocor and Exhalyzer D and the RMS attempted to directly measure both gas washouts. The results showed similar washout breath numbers and washout times i.e. N<sub>2</sub> reached the 1/40<sup>th</sup> end tidal concentration after SF<sub>6</sub>, suggesting that, having removed some software and equipment bias, this is real observation. However as highlighted we had difficulties with signal quality of RMS testing due to the low SF<sub>6</sub> concentrations and the use of 100% O<sub>2</sub> and different characteristics of the hardware i.e. signal to rise time or sampling frequency may also have contributed to the discrepancies; therefore these results should be interpreted with caution.

In conclusion, N<sub>2</sub> and SF<sub>6</sub> washouts are inherently different, higher for N<sub>2</sub>. A fundamental, non-linear bias in N<sub>2</sub> (even seen in HC individuals) should be considered when interpreting results. The variation between devices is in some cases larger than reported clinically relevant changes so are not dismissible.
